# Supplementary material
Source: PubMed Central journal article supplement (PMC3153516)
Supplement: supp_100138_case-arbour-1-at.pdf [file supp_100138_case-arbour-1-at.pdf]

**Appendix 1:** Twelve genes associated with long QT syndrome

| LQTS type | Gene           | Function                                    |
|-----------|----------------|---------------------------------------------|
| 1*        | <i>KCNQ1</i>   | $\alpha$ -Subunit of $I_{Ks}$               |
| 2*        | <i>KCNH2</i>   | $\alpha$ -Subunit of $I_{Kr}$               |
| 3*        | <i>SCN5A</i>   | $\alpha$ -Subunit of $I_{Na}$               |
| 4         | <i>ANK4</i>    | Ankyrin B: cytoskeletal membrane adapter    |
| 5         | <i>KCNE1</i>   | $\beta$ -Subunit of $I_{Ks}$                |
| 6         | <i>KCNE2</i>   | $\beta$ -Subunit of $I_{Kr}$                |
| 7         | <i>KCNJ2</i>   | $\alpha$ -Subunit of $I_{K1}$               |
| 8         | <i>CACNA1C</i> | $\alpha$ -Subunit of $I_{CaL}$              |
| 9         | <i>CAV3</i>    | Caveolin 3: trafficking                     |
| 10        | <i>SCN4B</i>   | $\beta$ -Subunit of $I_{Na}$                |
| 11        | <i>AKAP9</i>   | Yotiao: accessory protein for $I_{Ks}$      |
| 12        | <i>SNTA1</i>   | $\alpha_1$ -Syntrophin: scaffolding protein |

Note: LQTS = long QT syndrome.  
 \*75% of all clinically defined instances of LQTS and 95% of all genetically identifiable instances are due to mutations in *KCNQ1*, *KCNH2* and *SCN5A*.<sup>3,4</sup>
