# Supplementary material
Source: PubMed Central journal article supplement (PMC3153516)

Appendix 2: Map of the Northwest Health Service Delivery Area of the British Columbia Northern Health Authority showing the general region of the two First Nation communities with a high incidence of long QT syndrome (circled). Adapted with permission from the Northern Health Authority ([www.northernhealth.ca/Portals/0/About/documents/7631NH\\_RegionMap.pdf](http://www.northernhealth.ca/Portals/0/About/documents/7631NH_RegionMap.pdf)).

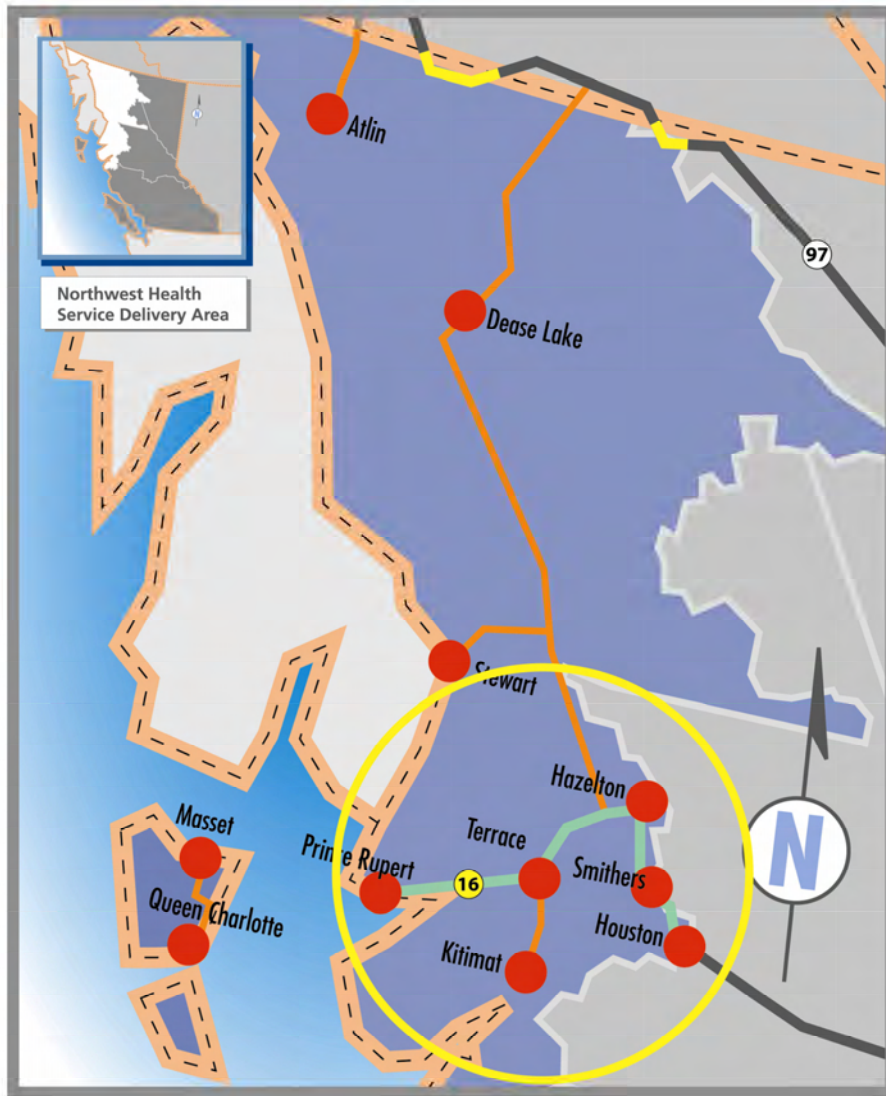

Supplement: supp_100138_case-arbour-2-at.pdf [file supp_100138_case-arbour-2-at.pdf]
